1 Mind the Outgroup: Influence of Taxon Sampling on Total-Evidence Dating of  
2 Pimpliform Parasitoid Wasps (Hymenoptera, Ichneumonidae)

3 TAMARA SPASOJEVIC<sup>1,2,3</sup>, GAVIN R. BROAD<sup>4</sup>, ILARI E. SÄÄKSJÄRVI<sup>5</sup>, MARTIN  
4 SCHWARZ<sup>6</sup>, MASATO ITO<sup>7</sup>, STANISLAV KORENKO<sup>8</sup>, AND SERAINA  
5 KLOPFSTEIN<sup>1,2,9</sup>

6 <sup>1</sup> *Invertebrates, Naturhistorisches Museum der Burgergemeinde Bern, Bernastrasse 15, 3005*  
7 *Bern, Switzerland*

8 <sup>2</sup> *Institute of Ecology and Evolution, University of Bern, Baltzerstrasse 6, 3012 Bern,*  
9 *Switzerland*

10 <sup>3</sup> *Department of Entomology, National Museum of Natural History, 10th St. & Constitution*  
11 *Ave. NW, Washington, DC 20560, USA*

12 <sup>4</sup> *Department of Life Sciences, Natural History Museum, Cromwell Road, London SW7 5BD,*  
13 *UK*

14 <sup>5</sup> *Biodiversity Unit, University of Turku, Turku, Finland*

15 <sup>6</sup> *Eben 21, A-4202 Kirchsschlag, Austria*

16 <sup>7</sup> *Graduate School of Agricultural Science, Kobe University, 657-8501 Japan*

17 <sup>8</sup> *Department of Agroecology and Biometeorology, Faculty of Agrobiological, Food and*  
18 *Natural Resources, Czech University of Life Sciences Prague, Prague 6, Suchbátka, Czech*  
19 *Republic*

20 <sup>9</sup> *Biowissenschaften, Naturhistorisches Museum Basel, Augustinerstrasse 2, 4051 Basel,*  
21 *Switzerland*

22 Correspondence to be sent to: Tamara Spasojevic, Department of Entomology, National  
23 Museum of Natural History, 10th St. & Constitution Ave. NW, Washington, DC 20560,  
24 USA, [spasojevic.ta@gmail.com](mailto:spasojevic.ta@gmail.com)

Spasojevic et al.

25 ABSTRACT

26 Taxon sampling is a central aspect of phylogenetic study design, but it has received  
27 limited attention in the context of molecular dating and especially in the framework of total-  
28 evidence dating, a widely used dating approach that directly integrates molecular and  
29 morphological information from extant and fossil taxa. We here assess the impact of different  
30 outgroup sampling schemes on age estimates in a total-evidence dating analysis under the  
31 uniform tree prior. Our study group are Pimpliformes, a highly diverse, rapidly radiating  
32 group of parasitoid wasps of the family Ichneumonidae. We cover 201 extant and 79 fossil  
33 taxa, including the oldest fossils of the family from the Early Cretaceous and the first  
34 unequivocal representatives of extant subfamilies from the mid Paleogene. Based on newly  
35 compiled molecular data from ten nuclear genes and a morphological matrix that includes  
36 222 characters, we show that age estimates become both older and less precise with the  
37 inclusion of more distant and more poorly sampled outgroups. In addition, we discover an  
38 artefact that might be detrimental for total-evidence dating: “bare-branch attraction”, namely  
39 high attachment probabilities of, especially, older fossils to terminal branches for which  
40 morphological data are missing. After restricting outgroup sampling and adding  
41 morphological data for the previously attracting, bare branches, we recover a Middle and  
42 Early Jurassic origin for Pimpliformes and Ichneumonidae, respectively. This first age  
43 estimate for the group not only suggests an older origin than previously thought, but also that  
44 diversification of the crown group happened before the Cretaceous-Paleogene boundary. Our  
45 case study demonstrates that in order to obtain robust age estimates, total-evidence dating  
46 studies need to be based on a thorough and balanced sampling of both extant and fossil taxa,  
47 with the aim of minimizing evolutionary rate heterogeneity and missing morphological  
48 information.

## TAXON SAMPLING IN TOTAL-EVIDENCE DATING

49 Keywords: ichneumonids, phylogeny, bare-branch attraction, fossils, RoguePlots,  
50 morphological matrix

51

52 The field of molecular dating was established with the first discovery of a correlation  
53 between sequence divergence and time (Zuckermandl and Pauling 1962) and has seen  
54 multiple revolutions since then. Today, evolutionary time scales can be estimated using  
55 sophisticated computational approaches that incorporate prior knowledge, elaborate  
56 mathematical models for sequence evolution and a direct way to integrate time information  
57 from fossils.

58 Until recently, the so-called “node dating” approach (ND) was mainly used for dating  
59 phylogenetic trees, with fossils providing minimum ages for specific nodes in a phylogeny.  
60 ND requires the prior assessment of fossil placement, which is usually far from  
61 straightforward, and it can only incorporate the oldest fossil assignable to a particular node.  
62 In addition, one must decide on a probability distribution of the node’s age, because minima  
63 are insufficient to date molecular trees; although largely arbitrary, these settings determine  
64 the outcome of any ND analysis (Warnock et al. 2011). These issues led to the development  
65 of the total-evidence dating approach (TED), which allows inclusion of all available fossils as  
66 tips, while accounting for uncertainty in their age and placement on a tree (Pyron 2011;  
67 Ronquist et al. 2012a). The downside of TED is that it requires extensive morphological  
68 matrices to be compiled, which inform fossil placements and infer associated branch lengths.  
69 Some concerns were also raised about the potential lack of clock-likeness of morphological  
70 data (O’Reilly et al. 2015), while some authors reported unrealistically old ages from their  
71 TED analyses when compared to the oldest known fossils of the group (Beck and Lee 2014;  
72 Arcila et al. 2015).

Spasojevic et al.

73           Several methodological modifications to the TED approach have been suggested, such  
74 as replacing the initially introduced uniform tree prior (Ronquist et al. 2012a) with the  
75 fossilized birth–death tree prior, which models speciation, extinction and fossilization rates to  
76 reconstruct branching events, and thus does not necessarily require morphological data  
77 (Heath et al. 2014; Ronquist et al. 2016; Zhang et al. 2016). It has also become possible to  
78 account for fossils possibly being sampled ancestors (Gavryushkina et al. 2014) and for a  
79 diversified sampling strategy of extant taxa (Höhna et al. 2011). Finally, some recent studies  
80 combined tip and node dating approaches (O’Reilly and Donoghue 2016; Kealy and Beck  
81 2017; O’Hanlon et al. 2018; Travouillon and Phillips 2018). Unfortunately, these different  
82 implementations of TED have often reported disagreeing age estimates (Grimm et al. 2015;  
83 Herrera and Davalos 2016; Harrington and Reeder 2017; Kealy and Back 2017; Gustafson et  
84 al. 2017), revealing plenty of potential for further improvements of the method (Parins-  
85 Fukuchi and Brown 2017; Brown and Smith 2018).

86           Incorporating more complex models often requires more and better data for improved  
87 estimation of model parameters. With the development of next generation sequencing  
88 technologies, acquiring large amounts of molecular data is no longer a problem (McCormack  
89 et al. 2013; Kjer et al. 2016), but taxon sampling is still a major limiting factor in  
90 phylogenetic study design. Numerous simulations and empirical studies have demonstrated  
91 positive effects of improved taxon sampling on the estimation of topology (Graybeal 1998;  
92 Dunn et al. 2008; Heath et al. 2008; Klopstein et al. 2017), branch lengths (Fitch and Bruschi  
93 1987; Pick et al. 2010), and parameters of evolutionary models (Zwickl and Hillis 2002;  
94 Heath et al. 2008). Nevertheless, thorough taxon sampling is not always easy to achieve,  
95 especially in very species-rich groups.

96           The sampling of outgroup taxa requires special attention: it should ideally include a  
97 sufficient sample of taxa that are closely related to, but clearly different from the taxa in

## TAXON SAMPLING IN TOTAL-EVIDENCE DATING

98 question – the ingroup (Wheeler 1990; Nixon and Carpenter 1993; Giribet and Ribera 1998;  
99 Graham et al. 2002; Philippe et al. 2011). An inadequately chosen outgroup can significantly  
100 affect topology estimates in non-clock analyses by introducing or at least exacerbating long  
101 branch attraction (Graham et al. 2002; Holland et al. 2003; Philippe et al. 2011) and/or by  
102 increasing compositional heterogeneity of sequences and among-lineage rate variation  
103 (Tarrío et al. 2000; Rota-Stabelli and Telford 2008; Borowiec et al. 2017).

104         Although the influence of outgroup choice on topology estimates is well documented,  
105 little is known about its impact on age estimates in molecular dating studies. Some empirical  
106 and simulation studies have reported biased age estimates in cases of large among-lineage  
107 rate variation (Milne 2009; Wertheim et al. 2012; Duchêne et al. 2014; Soares and Schrago  
108 2015), and highly imbalanced taxon sampling (Linder et al. 2005; Milne 2009; Soares and  
109 Schrago 2012, 2015; Duchêne et al. 2015). All of these could be introduced by an outgroup  
110 (Heard 1992; Blum et al. 2006; Borowiec et al. 2017). In addition, Duchêne et al. (2015) have  
111 shown that the effect of tree imbalance on age estimates is larger when heterochronous  
112 sequences are included, as is the case in molecular tip-dating with ancient DNA or in virus  
113 studies; a similar effect can be expected when fossil taxa of different ages are included as  
114 tips.

115         In the context of TED, outgroup choice has received little attention, and many studies  
116 have employed rather poor outgroup sampling, typically including one to just a handful of  
117 outgroup taxa which are severely underrepresented compared to the ingroup taxa, both in  
118 terms of morphological characters and fossils (Ronquist et al. 2012a; Arcila et al. 2015;  
119 Dornburg et al. 2015; Close et al. 2016; Herrera and Davalos 2016; Kittel et al. 2016; Lee  
120 2016; Bannikov et al. 2017). We here aim to test the influence of outgroup sampling on age  
121 estimates in TED, using parasitoid wasps of the family Ichneumonidae as a case study.

Spasojevic et al.

122           The Ichneumonidae is the most species-rich family of parasitoid wasps, with more than  
123 25,000 described species (Yu et al. 2016). We focus especially on Pimpliformes, a  
124 monophyletic group comprising nine subfamilies: Acaenitinae, Collyriinae, Cylloceriinae,  
125 Diacritinae Diplazontinae, Orthocentrinae, Pimplinae, Poemeniinae and Rhyssinae (Wahl and  
126 Gauld 1998; Quicke 2014; Klopstein et al. 2019). Pimpliformes are especially interesting  
127 from a biological perspective, since they cover nearly the entire diversity of hosts and  
128 parasitoid strategies known from ichneumonids (Broad et al. 2018). They oviposit into  
129 (endoparasitoids) or onto (ectoparasitoids) their host, which they either permanently paralyze  
130 (idiobionts) or allow to continue developing (koinobionts), and hosts span almost all  
131 holometabolous insect orders, as well as spiders (Araneae). Several attempts have been made  
132 in the past to reconstruct the evolution of important biological traits in Pimpliformes (Wahl  
133 and Gauld 1998; Gauld et al. 2002; Quicke 2014), but their conclusions were highly  
134 dependent on the stability and resolution of the pimpliform phylogeny, which is still in part  
135 unresolved (Klopstein et al. 2019).

136           Even less well understood than the sequence of events during the radiation of  
137 Pimpliformes is their timing and ecological context. The fossil record of ichneumonids is  
138 very poorly studied, and most described species come from just a handful of localities  
139 (Menier et al. 2004). It starts in the Early Cretaceous with the extinct subfamily Tanychorinae  
140 (Kopylov 2010a), but affiliation of this subfamily with Ichneumonidae is somewhat unclear,  
141 as its wing venation is intermediate between Ichneumonidae and their sister family  
142 Braconidae (Sharkey and Wahl 1992). The Palaeoichneumoninae (Kopylov 2009), also  
143 extinct and of a similar age, are thus usually referred to as the oldest ichneumonids (Sharkey  
144 and Wahl 1992; Quicke et al. 1999). All remaining ichneumonid fossils from the Cretaceous  
145 period have been classified in the extinct subfamilies Labenopimplinae and  
146 Novichneumoninae (Kopylov 2010b; Kopylov et al. 2010; Li et al. 2017), except for a single

## TAXON SAMPLING IN TOTAL-EVIDENCE DATING

147 amber fossil that was tentatively placed in the extant subfamily Labeninae (McKellar et al.  
148 2013). The oldest fossil associated with an extant pimpliform subfamily (and an extant genus)  
149 is an acaenitine, *Phaenolobus arvenus* Piton, from the latest Paleocene. However, its  
150 placement is questionable due to poor preservation, and more reliable records come from two  
151 Early Eocene localities, the Green River Formation and Messel Pit (Spasojevic et al. 2018a,  
152 2018b).

153 No studies have to date attempted to infer the age of Ichneumonidae as a whole or of  
154 Pimpliformes in particular. The only previous studies with some bearing on the question are  
155 one concerned with the sister family Braconidae (Whitfield 2002) and the other with the  
156 entire order Hymenoptera (Peters et al. 2017); both studies included a very sparse sample of  
157 ichneumonids. They report considerably different age estimates for the divergence between  
158 Ichneumonidae and Braconidae, approx. 138 Ma (Whitfield 2002) and 155–224 (mean 188)  
159 Ma (Peters et al. 2017). In addition to obtaining the first age estimates for Ichneumonidae and  
160 Pimpliformes and testing the influence of outgroup sampling on these estimates, we also  
161 investigate the influence of fossil sampling and placement and discuss the implications of our  
162 findings for taxon sampling in dating studies more generally.

## 163 MATERIAL AND METHODS

### 164 *Taxon Sampling*

165 We have included 289 tips comprising 210 extant and 79 fossil taxa, with a focus on the  
166 pimpliform subfamilies within Ichneumonidae. Among the extant taxa, nine were outside of  
167 Ichneumonidae, including seven Braconidae and two more distantly related parasitoid wasps  
168 from the superfamilies Chalcidoidea and Evanioidea. The remaining extant taxa included 30  
169 non-pimpliform ichneumonids belonging to 19 subfamilies, and an extensive sampling of  
170 Pimpliformes, for which we included 142 of the 188 known genera. For most genera, we

Spasojevic et al.

171 included a single representative, but additional species were included in some more  
172 heterogeneous genera. The complete list of extant taxa is given in Supplementary file S1.

173 We aimed to get a good representation of fossil taxa from different time periods: from  
174 the oldest ichneumonid fossils from the Early Cretaceous to fossils from the latest Oligocene  
175 period (Supplementary file S2). Due to the controversial position of the extinct subfamily  
176 Tanychorinae, which is somewhat intermediate in morphology between Ichneumonidae and  
177 Braconidae, and poor sampling of the morphological diversity in Braconidae, we excluded  
178 the two Tanychorinae fossils from most analyses (but see below).

### 179 *Morphological and Molecular Data*

180 We used the morphological matrix from Klopstein and Spasojevic (2019), but with a  
181 strongly expanded taxon sampling. Numerous additional character states were defined to  
182 capture the added specimen diversity. The complete morphological matrix consists of 222  
183 morphological characters coded initially for 150 extant and 79 fossil taxa (Supplementary  
184 File S3). After observing attraction of fossil taxa to some non-pimpliform ichneumonids for  
185 which we had not yet coded any morphological data (“bare-branch attraction”, see Results  
186 section), we added another 20 extant taxa to the morphological matrix, increasing the total  
187 number of scored extant taxa to 170. Morphology was scored for the same species from  
188 which we obtained molecular data, with a few exceptions where we scored a closely related,  
189 congeneric species for morphology (Supplementary file S1).

190 Our molecular dataset includes nine nuclear protein coding genes (primers and  
191 protocols in Klopstein et al. 2019), the D2/D3 portion of the nuclear rRNA gene 28S, and  
192 the mitochondrial cytochrome c oxidase (COI). We aimed to amplify these 11 genes for 146  
193 extant taxa and achieved good coverage, with an average of seven genes successfully  
194 sequenced per taxon (Supplementary File S4). The sequences were edited and aligned in



## TAXON SAMPLING IN TOTAL-EVIDENCE DATING

195 Geneious 7.1.3 (<https://www.geneious.com>, Kearse et al. 2012) using the MAFFT v.7.017  
196 plug-in and the algorithm “E-INS-I” (Kato and Standley 2013). The “translation alignment”  
197 option was used for protein coding genes. The complete alignment contained 5423 base pairs  
198 (bp) (Supplementary File S5, <TreeBase link>). The sequences are deposited in GenBank  
199 under accession numbers XXX.

### 200 *Non-clock Analysis*

201 To assess branch length heterogeneity and to examine the power of our combined  
202 molecular and morphological dataset to resolve ichneumonid relationships, we first ran a  
203 non-clock analysis. As the analysis showed convergence issues with parameter estimation for  
204 most of the 3<sup>rd</sup> codon partitions of the nine nuclear protein-coding genes and for the entire  
205 COI gene, we excluded those from all further analyses. The final alignment thus contained  
206 ten genes and 4,011 bp. We partitioned the dataset by gene and codon position and used  
207 PartitionFinder 2 (Lanfear et al. 2017) to identify partitions that could be combined (branch  
208 lengths = linked, models =all, model\_selection = aicc, search = rcluster). In addition, we  
209 combined all 1<sup>st</sup> and all 2<sup>nd</sup> codon position partitions, respectively, that contained fewer than  
210 30 parsimony informative sites, assuming that substitution model parameter estimates would  
211 be very poor for those (Supplementary File S5). All analyses were carried out using Bayesian  
212 inference in MrBayes 3.2.6 (Ronquist et al. 2012b) on the HPC cluster UBELIX of the  
213 University of Bern, Switzerland (<http://www.id.unibe.ch/hpc>). The preferred evolutionary  
214 model for all partitions was GTR+G+I according to PartitionFinder 2. As MrBayes allows  
215 model jumping over the entire GTR subspace, the model parameters for the molecular  
216 partitions were set as nst = mixed and rates = invgamma, with all substitution model  
217 parameters unlinked across partitions. Morphological characters were analyzed under the Mk  
218 model (Lewis 2001), accounting for ascertainment bias (“Mkv”, i.e., only variable characters  
219 coded), allowing gamma-distributed rate variation across characters, and ordering all the

Spasojevic et al.

220 characters where transition only between neighboring states could be assumed. This model  
221 has been identified as the preferred model for the morphological partition in a previous  
222 analysis (Klopfstein and Spasojevic 2018). The non-clock analysis included the full set of  
223 outgroup taxa (Chalcidoidea, Evanioidea, Braconidae and non-pimpliform Ichneumonidae),  
224 with *Gasteruption* (Evanioidea) chosen as the functional outgroup.

225 We ran four independent runs with four Metropolis-coupled chains each for 150 million  
226 generations with a sampling frequency of 1000. The heating coefficient was set to 0.05 in  
227 order to increase chain swap probabilities. To summarize the result, we used a conservative  
228 burn-in of 50%, while convergence of runs was assessed using typical Markov Chain Monte  
229 Carlo (MCMC) diagnostics: the average standard deviation of split frequencies (ASDSF),  
230 effective sample size (ESS), and the potential scale reduction factor (PSRF). We also visually  
231 inspected the trace plots of the likelihoods and of all parameters for all four runs using Tracer  
232 v1.7 (Rambaut et al. 2018).

### 233 *Total-Evidence Dating (TED) Analysis*

234 In addition to the settings above, in the TED analysis, we used a uniform tree prior and  
235 a relaxed clock model with independent gamma rates (IGR). To set priors on the relaxed-  
236 clock model parameters, we relied on the calculations from Ronquist et al. (2012a), putting  
237 an exponential prior on the IGR variance with a rate of 37.12, and a lognormal prior on the  
238 clock rate with a mean on the log scale of -7.08069 and standard deviation of 1; the standard  
239 deviation was decreased compared to Ronquist et al. 2012 to put increased weight on lower  
240 clock rates and thus older age estimates, assuming that our dataset contains enough  
241 information from the data to correctly estimate the posterior. The prior on the tree age was set  
242 to  $\text{offsetexp}(126, 309)$ , with the offset based on the minimum age of the oldest Evanioidea  
243 fossil (Deans et al. 2004), while the mean corresponds to the mean age estimate for

## TAXON SAMPLING IN TOTAL-EVIDENCE DATING

244 Hymenoptera from Ronquist et al. (2012a). In the analyses where outgroups were excluded  
245 (see below), we used the minimum age of the oldest certain ichneumonid fossils  
246 (Palaeoichneumoninae, 112.6 Ma) as an offset. We set a uniform prior on the age of the  
247 fossils according to the range of age estimates for the fossil stratum. See Supplementary File  
248 S2 for the full list of included fossils and their age intervals with respective references. To  
249 obtain the effective prior implied by our settings, including the clock rate (which is only  
250 effective when running with data), we performed an analysis without the fossils and thus  
251 without temporal information. We ran two independent runs for 100 million generations each  
252 and under three different clockrate settings, and always obtained a rather flat age distribution  
253 for crown group ichneumonids (Supplementary file S5). Our preferred setting for the clock  
254 rate (lognormal with mean of log values = -7.08069 and standard deviation =1), for instance,  
255 resulted in a median age estimate of 229.3 Ma and a 95% credibility interval of 51.3 –738.6  
256 Ma (Supplementary file S5). We can thus assume that any more precise age estimates  
257 resulting from the analyses with fossils will indeed be informed by the data and not the prior  
258 (Parins-Fukuchi and Brown 2017).

259 It has been shown that relaxed-clock models can lead to topology artefacts, especially  
260 close to the root (Ronquist et al. 2012a). We thus set hard constraints on the monophyly of  
261 Braconidae, Ichneumonidae and Ichneumonoidea (Braconidae + Ichneumonidae), each of  
262 which are widely accepted as being monophyletic and have been recovered in previous  
263 analyses (Sharkey and Wahl 1992; Downton and Austin 1994; Peters et al. 2017), as well as in  
264 our non-clock analysis. To improve convergence on the clock rate and tree length parameters,  
265 we increased the probability of the respective MCMC moves (MrBayes command blocks are  
266 provided as Supplementary File S7). MCMC convergence proved much more difficult to  
267 attain than in the non-clock analysis and was thus deemed satisfactory when the ASDSF  
268 value was below 0.03, ESS values of all scalar parameters were above 100, and PSRF values

Spasojevic et al.

269 were below 1.01. The ESS values between 50 and 100 and PSRF values above 1.01 were still  
 270 accepted for the tree length, tree height and clock rate parameters in some runs, as it was  
 271 difficult to get convergence on those even after 150 million generations.

272 *TED Outgroup Settings*

273 We tested five different outgroup sampling strategies (Table 1): i) “full outgroup” (with  
 274 all outgroup taxa as in the non-clock analysis), ii) “Braconidae” (all braconids, but excluding  
 275 the two non-ichneumonoid taxa), iii) “one Braconidae” (a single braconid taxon, *Homolobus*,  
 276 the only braconid with both molecular and morphological data), iv) “Tanychorinae” (two  
 277 potentially transitional fossils between braconids and ichneumonids, without including any  
 278 Braconidae), and v) “Xoridinae” (only members of Ichneumonidae as outgroups). There is  
 279 strong evidence that xoridines are sister to the remaining ichneumonids (Klopfstein et al.  
 280 2019). To set the outgroup, we enforced monophyly of the remaining extant taxa through a  
 281 topology constraint. None of the fossils were ever included in any topology constraint, but  
 282 their placement is instead estimated entirely from the morphological data.

283 Table 1. Summary of outgroup sampling strategies. Abbreviations in brackets stand for  
 284 higher level classification of the outgroup taxa: Eva–Evanioidea, Cha–Chalcidoidea, Bra–  
 285 Braconidae, Tan–Tanychorinae, Xor–Xoridinae.

|                               | outgroup setting   |              |                     |                |             |
|-------------------------------|--------------------|--------------|---------------------|----------------|-------------|
|                               | “full<br>outgroup” | “Braconidae” | “one<br>Braconidae” | “Tanychorinae” | “Xoridinae” |
| <i>Gasteruption</i> (Eva)     | x                  |              |                     |                |             |
| <i>Eupelmophotismus</i> (Cha) | x                  |              |                     |                |             |
| <i>Aleiodes</i> (Bra)         | x                  | x            |                     |                |             |
| <i>Aphidius</i> (Bra)         | x                  | x            |                     |                |             |
| <i>Cotesia</i> (Bra)          | x                  | x            |                     |                |             |
| <i>Dancusa</i> (Bra)          | x                  | x            |                     |                |             |
| <i>Diaeretus</i> (Bra)        | x                  | x            |                     |                |             |
| <i>Macrocentrus</i> (Bra)     | x                  | x            |                     |                |             |
| <i>Homolobus</i> (Bra)        | x                  | x            | x                   |                |             |

## TAXON SAMPLING IN TOTAL-EVIDENCE DATING

|                                                |   |   |   |   |   |
|------------------------------------------------|---|---|---|---|---|
| <i>Tanychora</i> (Tan)                         |   |   |   | X |   |
| <i>Kharsutella</i> (Tan)                       |   |   |   | X |   |
| <i>Xorides</i> (Xor)                           | X | X | X | X | X |
| <i>Odontocolon</i> (Xor)                       | X | X | X | X | X |
| <i>Aplomerus</i> (Xor)                         | X | X | X | X | X |
| <i>Ischnoceros</i> (Xor)                       | X | X | X | X | X |
| other non-pimpliform ichneumonids <sup>a</sup> | X | X | X | X | X |

286 <sup>a</sup> For a list of all included non-pimpliform taxa see Supplementary file S1.

### 287 *Fossil Placement*

288 We assumed that an erroneous placement of the oldest included fossils would have the  
289 greatest influence, if any, on the age estimates. We thus used “RoguePlots” as described in  
290 Klopstein and Spasojevic (2018) to examine the placement of the Cretaceous fossils on  
291 1,000 evenly sampled trees from the four runs in relevant analyses (R package available at  
292 <https://github.com/seraklop/RoguePlots>). In the “Xoridinae” outgroup setting, the Cretaceous  
293 impression fossils were predominantly placed on some terminal branches leading to non-  
294 pimpliform taxa without morphological data (see Results section). We thus ran an additional  
295 analysis with the “Xoridinae” outgroup sampling scheme and an improved morphological  
296 matrix, which now did not contain any outgroup taxa without morphological data.

## 297 RESULTS

### 298 *Tree Resolution and Topology*

299 The backbone of the majority-rule consensus trees from both the non-clock and TED  
300 analyses was unresolved when fossils were included, which also reflected in the node support  
301 values for lower-level relationships. However, when the fossils were excluded from the  
302 sampled trees before summarizing them, the resolution at the backbone was strongly  
303 improved and all the basal pimpliform nodes were highly supported in the non-clock analysis  
304 (posterior probability >0.95). There were only a few topological differences between the non-

Spasojevic et al.

305 clock and TED consensus trees, all concerning weakly supported nodes in both of the  
306 analyses (Supplementary files S6 and S7).

307 Most of the expected higher-level relationships outside of Pimpliformes were  
308 recovered, such as Xoridinae as the sister group to all other ichneumonids, and the  
309 monophyly of the higher groupings Ophioniformes, Ichneumoniformes and Pimpliformes  
310 (Fig. 1). Within Pimpliformes, Diplazontinae were recovered as the sister group of the  
311 remaining subfamilies. The majority of pimpliform subfamilies were recovered as  
312 monophyletic, the exceptions being Cylloceriinae, Diacritinae and Pimplinae (if we disregard  
313 a few taxa with alternative placements, see below). The tribe Pimplini was recovered  
314 separately from the other pimpline tribes and close to the base of Pimpliformes. It comprised  
315 two clearly separate clades, *Xanthopimpla* + *Lissopimpla* and the remaining Pimplini genera,  
316 including *Echthromorpha*.

317 The Poemeniinae genus *Rodrigama* was recovered as the sister taxon to a clade that  
318 includes all koinobiont endoparasitoids in Pimpliformes (except Diplazontinae). Within that  
319 clade, Acaenitinae had the most basal position, while the relationships among the remaining  
320 subfamilies were poorly resolved. The monophyly of Acaenitinae was supported, but  
321 *Pseudopimpla* (Ephialtini) clustered with *Coleocentrus* (Acaenitinae). For three additional  
322 genera, unexpected positions were highly supported: *Ortholaba* (Diacritinae) was recovered  
323 with *Collyria* (Collyriinae), *Rossemia* (Cylloceriinae) grouped with *Apoclima*  
324 (Orthocentrinae), and *Terminator* (Orthocentrinae) grouped with *Diacritus* (Diacritinae).

325

## TAXON SAMPLING IN TOTAL-EVIDENCE DATING

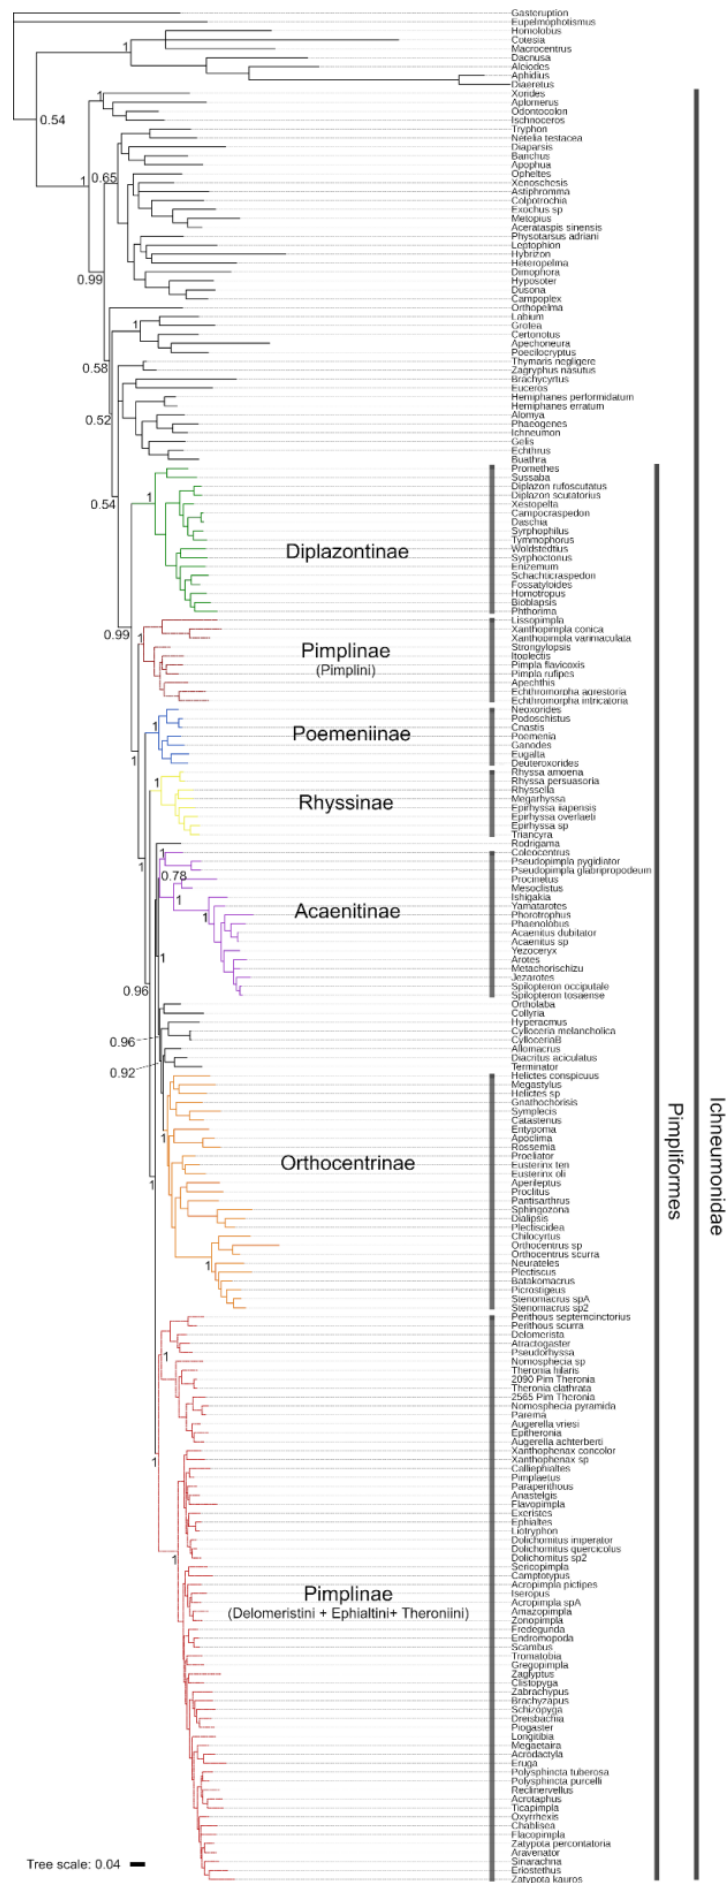

Spasojevic et al.

327 Figure 1. Majority rule consensus tree of the non-clock analysis of the “full outgroup”  
328 setting. The tree contains only extant tips, as fossils were excluded prior to summarizing the  
329 tree samples from the Bayesian analysis. Posterior probability values are given only for the  
330 nodes of interest.

331

### 332 *Impact of Outgroup Sampling on Age Estimates*

333 Both the age estimates and corresponding 95% credibility intervals (CI) were strongly  
334 influenced by the outgroup-sampling strategy (Fig. 2). Age estimates were consistently older  
335 when outgroup taxa other than ichneumonids or Tanychorinae were included (i.e., more  
336 distant and more poorly sampled outgroups) (Fig. 2, Supplementary file S7 and S8).  
337 Credibility intervals were widest when Tanychorinae, which only had very few coded  
338 morphological characters, were used as outgroup, followed by the strategy with seven  
339 braconid taxa. (Fig. 2, Supplementary file S8).

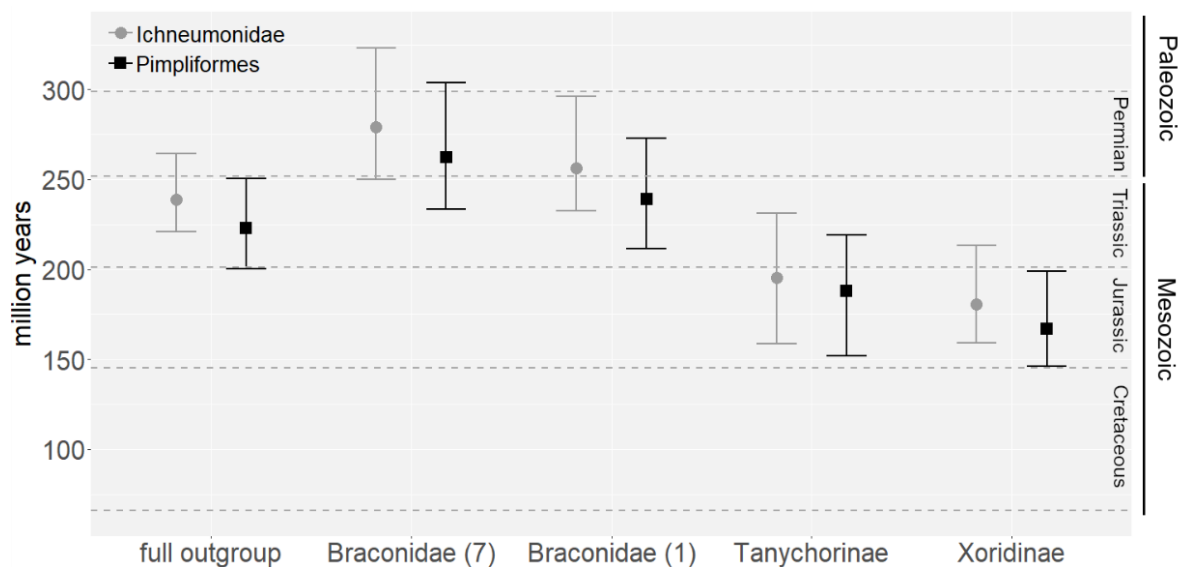

340

341 Figure 2. Age estimates in million years for Ichneumonidae and Pimpliformes across  
342 different analyses. The median and 95% credibility intervals for different outgroup settings



## TAXON SAMPLING IN TOTAL-EVIDENCE DATING

343 are plotted on the y axis. Numbers in brackets indicate included number of Braconidae taxa.

344 Dashed horizontal lines indicate transitions between major geological periods.

345

346 In addition, we assessed the impact of outgroup settings on the variance of the clock

347 rate to detect possible inadequacy of the relaxed clock model to correctly estimate

348 evolutionary rates when distant outgroups are included. The estimated variance for the

349 relaxed clock (IGR) varied considerably across the different outgroup settings (Fig. 3). It was

350 nearly twice as high in the analyses with distant outgroups (“full outgroup” and

351 “Braconidae”) compared to the analyses with close outgroups (“Tanychorinae” and

352 “Xoridinae”). The exception was when a single braconid was included, in which case the

353 estimated clock variance was similar to the analyses with only close outgroups.

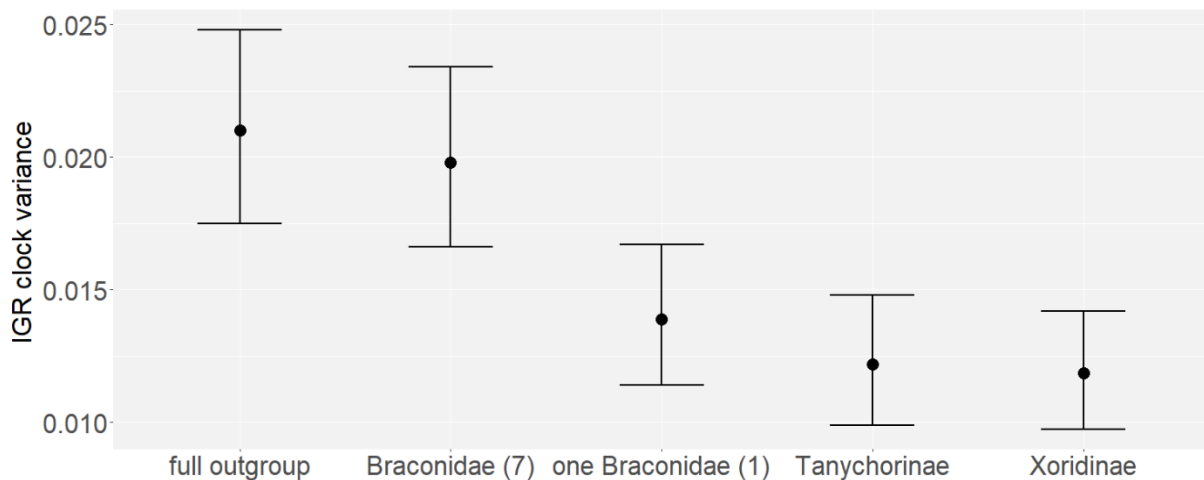

354

355 Figure 3. Estimates of the variance of the relaxed-clock. Median and 95% credibility

356 intervals are plotted on the y axis across different outgroup settings. Numbers in brackets

357 indicate included numbers of Braconidae taxa.

358

Spasojevic et al.

359 *Placement of Cretaceous Fossils*

360 Placements of most of the Cretaceous compression fossils in our initial analyses with  
361 different outgroup settings were rather similar: they clustered predominantly within crown-  
362 groups of non-pimpliform ichneumonid subfamilies (Fig. 4a, Supplementary file S8). The  
363 highest placement probabilities were centered around extant Banchinae (*Banchus* and  
364 *Apophua*) and Tersilochinae (in the case of Labenopimplinae and *Tryphopimpla xoridoptera*)  
365 and/or on the branch leading to *Orthopelma* (especially in Palaeoichneumoninae), with only a  
366 few weakly supported placements in other parts of the tree (less than 10% attachment  
367 probability). All Labenopimplinae were placed with the highest probability (34–44%,  
368 respectively) on the branch leading to *Banchus*. The overall support that Labenopimplinae  
369 belong to crown group Banchinae was quite high (46–53%), and it was even higher if we also  
370 consider stem Banchinae (63–73%). *Tryphopimpla xoridoptera* was mostly associated with  
371 *Apophua* (34%) with a total probability of attachment within Banchinae of 55% and within  
372 extant or stem Banchinae of 71%. In contrast, the small undescribed ichneumonid  
373 (3311\_856b) from Late Cretaceous Yantardakh amber (Rasnitsyn et al. 2016) was attached  
374 with very high probability (97%) to the branch leading to the extant Phygadeuontinae genus  
375 *Gelis*. Interestingly, most of the tips to which the Cretaceous fossils attached contained no or  
376 only sparse morphological information (Fig. 4a).

377 We repeated the analysis with the “Xoridinae” outgroup setting after improving the  
378 scoring of morphological characters for the outgroup taxa, especially those on attracting, bare  
379 branches. The placement of the Cretaceous impression fossils shifted considerably and  
380 mostly towards the root of the tree compared to the previous analysis (Fig. 4b). Most of the  
381 Cretaceous fossils were now placed on stem branches of both non-pimpliform and  
382 pimpliform lineages, with some placement probability still on the long branches of outgroup  
383 taxa (e.g., *Orthopelma*, *Brachycyrtus*). All Labenopimplinae now attached with the highest

## TAXON SAMPLING IN TOTAL-EVIDENCE DATING

384 probability on the stem branch of the most basal pimpliform subfamily Diplazontinae (23-  
385 39%) and on a nearby long branch leading to the extant tryphonine genera *Zagryphus* and  
386 *Thymaris* (22-32%). The probabilities of a placement of the Cretaceous impression fossils  
387 with crown Banchinae was now close to zero (Fig. 4).

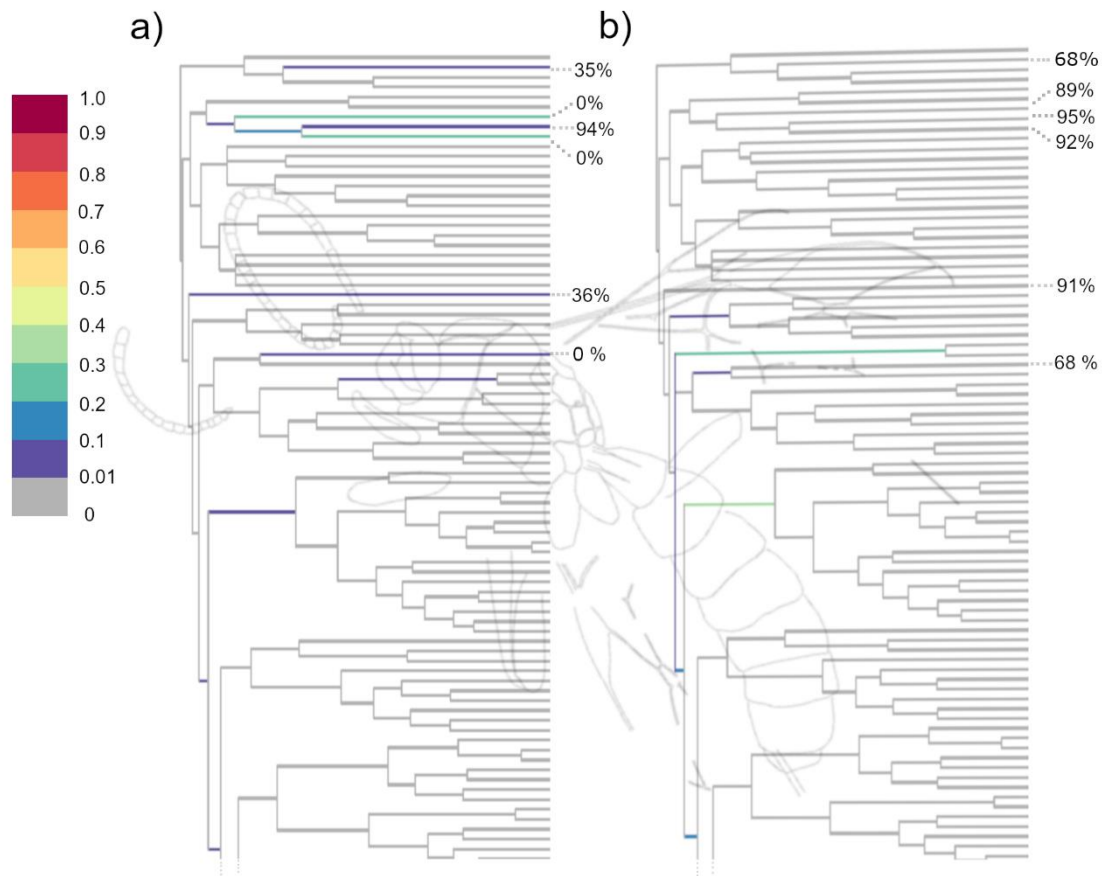

388

389 Figure 4. Placement of a representative of the Cretaceous fossils (*Labenopimpla*  
390 *kasparyan*) in the “Xoridinae” analysis a) with and b) without some outgroup taxa missing  
391 morphological data. The trees represent majority rule consensus trees with fossils excluded.  
392 Branches are colored by probability of a fossil attaching to them (RoguePlots). Percent values  
393 refer to the portion of scored morphological characters for a given terminal branch. The  
394 remaining Cretaceous compression fossils had similar attachment patterns as the ones  
395 depicted here (Supplementary file S9). Background image modified after (Kopylov 2010b).

Spasojevic et al.

396 *Impact of fossil placement on age estimates*

397 Although the placement of the Cretaceous fossils significantly changed when the  
398 improved morphological matrix was employed, the median age estimates remained relatively  
399 stable (Fig. 5). In contrast, there was a more obvious improvement in the precision of the age  
400 estimates for all but one of the examined nodes (Supplementary file S8).

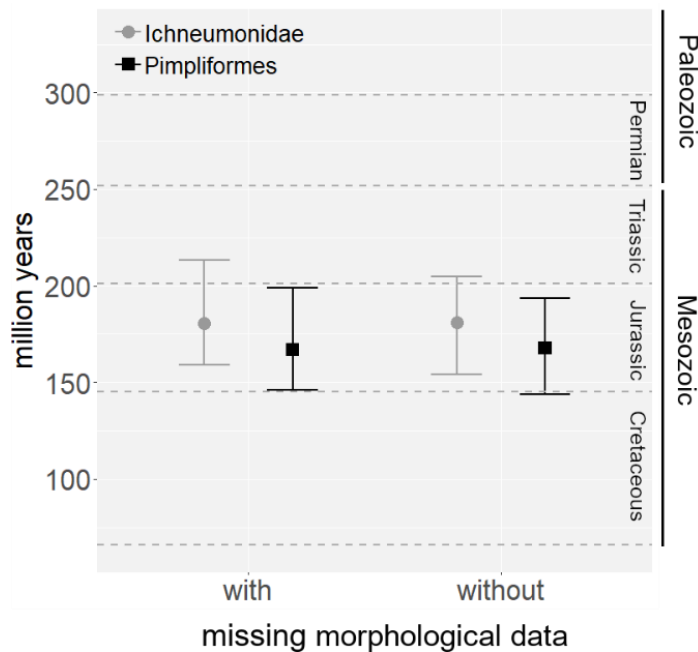

401

402 Figure 5. Age estimates in million years for Ichneumonidae and Pimpliformes in  
403 “Xoridinae” outgroup analyses with (left) and without (right) “bare-branches” for some  
404 outgroup taxa. The median and 95% credibility intervals are plotted on the y axis. Dashed  
405 horizontal lines indicate transitions between major geological periods.

406

407 *Age of Pimpliformes*

408 The median age estimates for Pimpliformes varied widely across the different outgroup  
409 analyses, ranging from 167 Ma to 263 Ma (Fig. 2, Supplementary File S8). We suppose that  
410 the age estimates were biased when more distant outgroups were included, as these outgroups

## TAXON SAMPLING IN TOTAL-EVIDENCE DATING

411 were poorly sampled and no fossils provided time information for the outgroup branches to  
412 accurately estimate evolutionary rate in this part of the tree. This notion is supported by the  
413 smaller clock-rate variance and higher consistency in the age estimates when only close  
414 outgroups (“Tanychorinae” and “Xoridinae”) were included.

415 We thus report here only the preferred age estimates from the “Xoridinae” outgroup  
416 setting, with the improved morphological matrix, as we deem initial placement of most of the  
417 Cretaceous fossils among extant Banchinae erroneous (Table 2, Fig. 6). The preferred age  
418 estimates suggest that Ichneumonidae originated during the Early to Middle Jurassic and  
419 Pimpliformes during the Middle to Late Jurassic. The start of the radiation of the extant  
420 pimpliform subfamilies is estimated as having occurred in the Early Cretaceous.

421 Table 2. Age estimates from the preferred analysis with credibility intervals for  
422 Ichneumonidae, Pimpliformes and the pimpliform subfamilies. As the subfamily Pimplinae  
423 was not recovered as monophyletic, age estimates for the tribes are given (Delomeristini,  
424 Ephialtini, Pimplini and Theroniini). The Diptera parasitoids here comprise three subfamilies:  
425 Cylloceriinae, Diacritinae and Orthocentrinae (excluding Diplazontinae and the diacritine  
426 *Ortholaba*, which did not form a monophyletic group with them).

| <b>Taxon Group</b>  | <b>Median</b> | <b>Mean</b> | <b>95% Credibility</b> |
|---------------------|---------------|-------------|------------------------|
| Ichneumonidae       | 181.2         | 181.4       | 154.0–204.7            |
| Pimpliformes        | 167.8         | 168.7       | 144.0–193.4            |
| Diptera parasitoids | 126.2         | 127.8       | 107.3–150.0            |
| Acaenitinae         | 127.6         | 129.0       | 105.1–156.7            |
| Diplazontinae       | 123.5         | 124.8       | 98.9–152.0             |
| Poemeniinae         | 82.7          | 83.5        | 59.1–113.4             |
| Rhyssinae           | 96.8          | 97.7        | 69.6–129.9             |
| Delomeristini       | 79.7          | 80.6        | 51.1–111.8             |
| Ephialtini          | 103.7         | 105.4       | 82.9–128.9             |
| Pimplini            | 146.7         | 147.4       | 122.1–175.1            |
| Theroniini          | 80.4          | 80.8        | 54.3–106.7             |

427

Spasojevic et al.

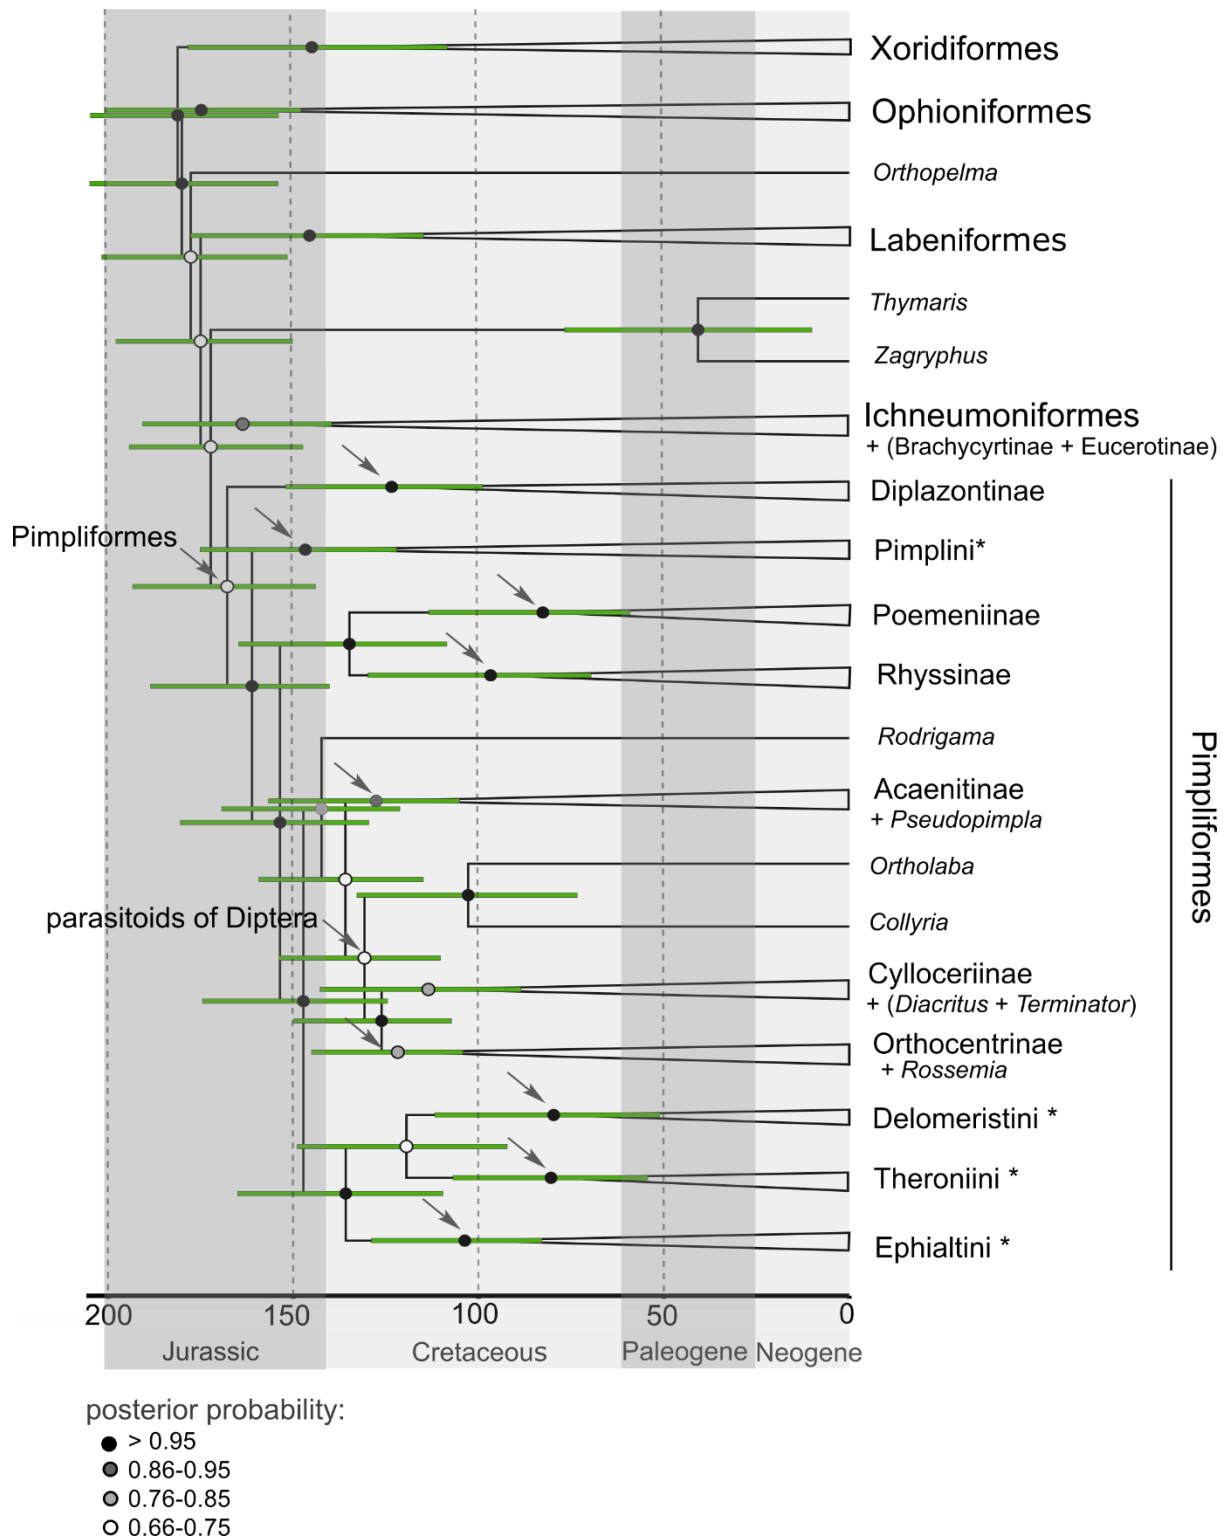

428

429

430

431

432

Figure 6. Dated majority rule consensus tree from the total-evidence dating analysis

under the “Xoridinae” outgroup setting with improved morphological matrix. The tree

contains only extant tips, as the fossils were excluded prior to summarizing tree samples from

the MCMC analysis. Most of the clades are collapsed to depict subfamily level relationships

## TAXON SAMPLING IN TOTAL-EVIDENCE DATING

433 among Pimpliformes. Arrows indicate nodes for which age estimates are represented in Table  
434 1. The names of the nodes are given if they do not correspond to the names of their tips.  
435 Horizontal bars represent median and 95% credibility intervals for age estimates.

436

### 437 DISCUSSION

#### 438 *Impact of Outgroup Sampling on Age Estimates*

439 Multiple studies have shown that outgroup choice can greatly affect tree topology  
440 estimates, especially in cases with large heterogeneity of branch lengths and uneven taxon  
441 sampling (Puslednik and Serb 2008; Ware et al. 2008; Hayes et al. 2009; Thomas et al. 2013;  
442 Kirchberger et al. 2014; Wilberg 2015), but its influence on divergence time estimates,  
443 especially in the context of total-evidence dating, has scarcely been studied at all. We show  
444 here that with the inclusion of more distantly related and/or poorly sampled outgroups, the  
445 age estimates become older and often less precise.

446 In these last six years since total evidence dating became established, a majority of  
447 studies have employed rather poor outgroup sampling, typically including one to just a  
448 handful of taxa (Ronquist et al. 2012a; Arcila et al. 2015; Dornburg et al. 2015; Close et al.  
449 2016; Herrera and Davalos 2016; Kittel et al. 2016; Lee 2016; Bannikov et al. 2017). We  
450 here covered most of the outgroup sampling schemes found in these studies, from including a  
451 single taxon from the sister group (“one Braconidae” outgroup setting), over a few taxa from  
452 the sister group (“Braconidae”), to the inclusion of a series of more to less closely related  
453 outgroup taxa (“full outgroup”).

454 As in most of the previous studies, our outgroups were not only sparsely sampled for  
455 extant taxa, but were also missing fossils and most of the morphological data. All these

Spasojevic et al.

456 outgroup settings recovered older and usually less precise age estimates than when restricting  
457 our dataset to more closely related outgroup taxa for which greater and more even effort in  
458 sampling both of extant and fossil taxa has been applied (“Xoridinae” outgroup setting).  
459 Interestingly, when two potentially transitional fossils between Braconidae and  
460 Ichneumonidae were used as outgroup (“Tanychorinae” outgroup setting), the median age  
461 estimates and clock variance were not affected, but their precision was. This could result  
462 from the larger uncertainty in the age of these fossils (Supplementary file S2) and the fact that  
463 only very few morphological characters were scored for them (9% and 17%, respectively).

464 Our results might suggest that many of the previous TED analyses would recover  
465 younger and likely more accurate age estimates with more detailed and/or restricted outgroup  
466 sampling. Presumably, the effect would be most pronounced for datasets where there is a  
467 long, unbroken outgroup branch which introduces large rate heterogeneity among lineages. A  
468 similar effect has been demonstrated for node dating in the simulation study by Soares and  
469 Schrago (2015), where age estimates were significantly biased when there was a combination  
470 of large among lineage rate variation and poor taxon sampling. Both accuracy and precision  
471 were affected: the mean age of the node in question was constantly overestimated and  
472 precision severely decreased. Large heterogeneity of evolutionary rates can already be  
473 identified on a non-clock tree by comparing branch lengths and outgroup taxa accordingly  
474 excluded, as we exemplified in our study; but this has rarely been employed in total evidence  
475 dating studies (but see Grimm et al. 2015).

#### 476 *Challenges for fossil placement in TED*

477 In TED analyses, the placement of fossils is solely dependent on the available  
478 morphological information for both fossil and extant taxa. The quality of fossil placement  
479 based on morphological matrices is thus primarily limited by imperfect preservation of



## TAXON SAMPLING IN TOTAL-EVIDENCE DATING

480 fossils, but also by high levels of morphological homoplasy, which has been reported for  
481 ichneumonids (Gauld and Mound 1982; Klopstein and Spasojevic 2019). We here identified  
482 another potentially major issue in TED studies, which we called “bare-branch attraction”: the  
483 tendency of especially older fossils to attach to terminal branches leading to extant taxa for  
484 which no morphological data has been collected. This artefact exposes the dangers of  
485 insufficient sampling of extant taxa for morphology, which can distort fossil placement and  
486 as a consequence age estimates in TED analyses.

487 Many of the previous TED studies included from a few to more than half of the extant  
488 taxa without morphological data, while some of the extant taxa scored for morphology had  
489 high amounts of missing data (Ronquist et al. 2012b; Arcila et al. 2015; Dornburg et al. 2015;  
490 Harrington and Reeder 2017). Guillerme and Cooper (2016) addressed this issue in the  
491 context of topology reconstruction in TED analyses. In their simulations, topology estimates  
492 were more negatively affected by a large percentage of extant taxa with missing  
493 morphological data than by any other analyzed parameter. It remains unclear to what extent  
494 their results were influenced by bare-branch attraction, as they did not analyze individual  
495 fossil placements, but the artefact was likely playing up under their scenario as well.

496 In our study, bare-branch attraction mostly concerned the compression fossils from the  
497 Cretaceous. These fossils are all, except *T. xoridoptera*, classified in two extinct subfamilies,  
498 Palaeoichneumoninae and Labenopimplinae. The phylogenetic position of these subfamilies  
499 is unclear, but two options have been suggested: a transitional position between Tanychorinae  
500 and extant Ichneumonidae, which would mean they represent stem ichneumonids, or some  
501 rather basal position as crown ichneumonids (Kopylov 2009, 2010b). In fact, the name  
502 “Labenopimplinae” reflects some similarity to the extant subfamilies Labeninae and  
503 Pimplinae, which would indicate the latter option (Kopylov 2010b).

Spasojevic et al.

504 We showed that the predominant placement of most Labenopimplinae (and other  
505 Cretaceous compression fossils) with crown group Banchinae and Tersilochinae in our initial  
506 analysis, was a consequence of the bare-branch attraction artefact. Among the branches  
507 where these fossils attached on the tree, only a single tip (*Apophua*) contained morphological  
508 data, while the remaining taxa were only sampled for molecular characters. Some other,  
509 younger fossils with rather diffuse placement also often attached to these branches, which  
510 might suggest that when morphological information for the placement of a fossil is limited,  
511 TED analyses tend to place a fossil on “bare-branches”, especially if those branches are long.  
512 Decreasing the percentage of extant taxa with missing morphological information, especially  
513 among the outgroups, from 27% to 16% was enough to reverse the initially erroneous  
514 placements of the oldest included compression fossils, which were instead placed on rather  
515 basal branches of crown group ichneumonids, in accordance with the second hypothesis  
516 suggested at the time of their original description (Kopylov 2009, 2010b).

517 It remains to be shown whether older and/or ancestral fossils are more prone to bare-  
518 branch attraction, or if it influences fossils of all ages to a similar extent. Additional analyses  
519 are also needed to determine under which conditions the erroneous fossil placement is  
520 leading to biased age estimates. In our study, we did not see a large negative impact of bare-  
521 branch attraction, but this will presumably not always be the case – we might just have been  
522 lucky that the attracting bare branches were spanning the age of the true placements as well,  
523 which was then informed correctly by the numerous remaining fossils. And even in our case,  
524 the precision of age estimates was improved by reducing the number of bare branches in the  
525 phylogeny.

#### 526 *The age of Pimpliformes and the biological context of their diversification*

527 Our most credible analysis estimated the median age of the family Ichneumonidae to  
528 184 Ma (95% CI: 168.3–203.9 Ma) and of Pimpliformes to 172 Ma (95% CI: 157.3–191.1

## TAXON SAMPLING IN TOTAL-EVIDENCE DATING

529 Ma), i.e., the Early and Middle Jurassic period, respectively. Compared to the fossil record,  
530 the estimated age for Ichneumonidae is 60–70 Ma older than the oldest certain ichneumonid  
531 fossils, which would imply a rather long ghost lineage. However, a similar gap in the fossil  
532 record is present between the oldest and the second oldest ichneumonid fossils  
533 (Palaeoichneumoninae and Labenopimplinae: between 26 and 53 Ma, depending on the  
534 adopted age of the geological formations in question), suggesting that the implied ghost range  
535 is not that long after all. Such a gap is even more acceptable if we consider the paucity of  
536 Jurassic Hymenoptera fossils in general (Rasnitsyn and Quicke 2002). Furthermore, the last  
537 few years have seen unexpected discoveries of fossils that have closed large gaps between  
538 much older (molecular) age estimates and the previously known fossil record, for instance in  
539 Lepidoptera (Eldijk et al. 2018).

540 Further insights into the age of ichneumonids come from age estimates for their hosts,  
541 predominantly holometabolous insects, which had to originate before their parasitoids could  
542 radiate. Initially, the radiations of the biggest orders of holometabolous insects,  
543 Hymenoptera, Coleoptera, Diptera and Lepidoptera, were believed to have been associated  
544 with the radiation of flowering plants and were dated to the Early Cretaceous (Grimaldi 1999;  
545 Misof et al. 2014). However, these estimates were later deemed too young, and a Late  
546 Permian origin was suggested based on a re-analysis of a large phylogenomic dataset (Misof  
547 et al. 2014) with more appropriate calibration points (Tong et al. 2015). This later study  
548 implies that the major host groups for ichneumonids were already present during the Jurassic,  
549 when both Ichneumonidae and Pimpliformes originated, suggesting that the radiation of these  
550 parasitoids might have happened only shortly after the radiation of their host groups.

Spasojevic et al.

551 *Taxonomic implications*

552 To date, some relationships among pimpliform subfamilies have remained unresolved,  
553 most likely due to a rapid radiation early in their evolution (Klopfstein et al. 2019). In our  
554 study, we utilized a small set of eleven genes but with an extensive sampling of pimpliform  
555 genera and morphological characters. We recovered a very similar tree topology as in the  
556 nucleotide versions of the previous analysis. The few differences mainly concern  
557 relationships within the clade of koinobiont endoparasitoids, but these were weakly resolved  
558 in both analyses. However, with our increased taxon sampling, we recover some previously  
559 unclear or unidentified relationships.

560 The monophyly of Acaenitinae was never supported in previous molecular analyses  
561 (Quicke et al. 2009; Klopfstein et al. 2019), while we recovered it with some support  
562 (posterior probability around 0.8), but including the Ephialtini genus *Pseudopimpla*.  
563 Acaenitines are morphologically easily recognized by the large and elongate hypopygium,  
564 but are otherwise a rather heterogenous group (Förster 1869; Broad et al. 2018). Although the  
565 hypopygium of *Pseudopimpla* is not as large as in *Coleocentrus*, with which it clustered in  
566 our analyses, it is strongly sclerotized and clearly elongate, as in some other acaenitine genera  
567 (e.g., *Procinetus*, *Leptacaenitus*, *Prosacron*). In addition, *Pseudopimpla* also has a very  
568 elongate eighth tergite in females, as is often seen in Acaenitinae (including *Coleocentrus*)  
569 and only rarely in Pimplinae (*Pimplaetus*, *Pachymelos*); the eighth tergite is also elongate in  
570 males of *Pseudopimpla*, as well as in *Coleocentrus*. The presence of lobes on the tarsal claws  
571 in *Pseudopimpla* suggests a placement of the genus in Ephialtini (Gauld et al. 2002), but  
572 these lobes have evolved several times independently in ichneumonids in any case (at least in  
573 some Pimplinae, Labeninae, Orthopelmatinae and Collyriinae), and are also present in the  
574 acaenitine genus *Hallocinetus* (Townes 1971). It is noteworthy that *Pseudopimpla* lacks one

## TAXON SAMPLING IN TOTAL-EVIDENCE DATING

575 of the apomorphies used to define Pimplinae, namely a sculpturally differentiated posterior  
576 band on the metasomal tergites. We thus here transfer *Pseudopimpla* to Acaenitinae.

577 The placements of the cylocerine *Allomacrus* and orthocentrine *Terminator* with  
578 *Diacritus*, and of the cyloceriine *Rossemia* within Orthocentrinae are also strongly  
579 supported, but we refrain from any taxonomic changes, considering the poor resolution at  
580 subfamily level in this part of the tree. In any case, our results might suggest that  
581 Cyloceriinae, Diacritinae and Orthocentrinae constitute an entity which is difficult to  
582 subdivide, based on both molecular and morphological evidence. The close association of  
583 these three subfamilies is also supported by their biology, where known, as koinobiont  
584 endoparasitoids of Diptera, so these three subfamilies might be synonymized in the future.  
585 However, there are no reliable host records for *Allomacrus*, *Diacritus*, *Ortholaba*, *Rossemia*  
586 or *Terminator* (Broad et al. 2018), and we thus refrain here from any formal changes.

587 The monophyly of the subfamily Pimplinae has already been questioned in the past. It  
588 has been supported both with the morphological (Gauld et al. 2002) and the latest 28S dataset  
589 (Quicke et al. 2009), but some earlier analyses had recovered Pimplini separately from  
590 Ephialtini (Belshaw et al. 1998; Quicke et al. 2000). This was also the case in Klopstein et  
591 al. (2019), where at least the genus *Xanthopimpla* (in nucleotide and amino acid analyses), if  
592 not the entire Pimplini (in nucleotide analyses), clustered apart from the remaining Pimplinae.  
593 Morphologically, there are not many clear synapomorphies for Pimplinae (Gauld et al. 2002),  
594 and the Pimplini show many plesiomorphic character states, such as a quadrate areolet, rather  
595 stout and short first tergite with dorsal median carinae, and an ovipositor of intermediate  
596 length, all of which have had already been present in some Cretaceous Labenopimplinae and  
597 could also have had been present at the base of Pimpliformes. Further investigation, such as  
598 the detection of possible anomalies in the nucleotide data, is needed in order to decide

Spasojevic et al.

599 whether *Xanthopimpla* and *Lissopimpla* or even all of Pimplini should be transferred to a  
600 separate subfamily.

## 601 CONCLUSIONS

602 We have demonstrated that poor outgroup sampling can negatively affect both accuracy  
603 and precision of age estimates in total-evidence dating analyses. To achieve more reliable  
604 age estimates, one should consider a more detailed taxon sampling that includes  
605 morphological and fossil data from a closely related outgroup, or alternatively first perform a  
606 non-clock analysis including outgroups, and then use topology constraints to correctly  
607 position the root in the dating analysis, while excluding any sparsely sampled outgroup taxa.

608 We also illustrated the importance of careful consideration of fossil placement in total-  
609 evidence dating analyses in order to identify artefacts or biases. The bare-branch attraction  
610 artefact that we have discovered here might turn out to be universally problematic for TED.  
611 Thus, it deserves further assessment in the future, possibly through simulation studies, but it  
612 can easily be circumvented by a more complete sampling of morphology for extant taxa.

613 Finally, we provided the first age estimate for the extremely diverse group of  
614 ichneumonid parasitoid wasps. The obtained Jurassic origin for the family and for  
615 Pimpliformes agrees with the timing of the radiation of their major host groups. It remains to  
616 be seen how the age estimate for the family will change when more fossils are included in a  
617 TED analysis; this will require a major upgrade of the morphological matrix that includes  
618 filling in all the missing morphological information and improving the sampling of non-  
619 pimpliform ichneumonid extant taxa.

## 620 FUNDING

## TAXON SAMPLING IN TOTAL-EVIDENCE DATING

621 This work was supported by the Swiss National Science Foundation (grant number  
622 PZ00P3\_154791 to SK).

### 623 ACKNOWLEDGEMENTS

624 For access to fossil specimens, we are grateful to Marsh Finnegan and Alan M. Rulis  
625 (Smithsonian National Museum of Natural History, Washington, USA), Talia Karim and  
626 David Zelagin (Museum of Natural History, University of Colorado, Boulder, USA) and  
627 Ricardo Pérez-de la Fuente (Museum of Comparative Zoology, Harvard University, USA).  
628 We also thank Dmitry Kopylov (Borissiak Paleontological Institute, Russian Academy of  
629 Sciences, Moscow, Russia) and Sonja Wedmann (Forschungsstation Grube Messel,  
630 Senckenberg, Germany) for providing access to additional fossil specimens and for  
631 commenting on derived fossil ages. We are grateful to Eric Chapman and Mike Sharkey  
632 (Kentucky, USA), Rikio Matsumoto (Osaka, Japan), and the Swedish Malaise Trap project  
633 for extensive material for morphological and molecular studies. Remo Ryser (German Centre  
634 for Integrative Biodiversity Research, Leipzig, Germany) and Djordje Markovic (Institute of  
635 Zoology, University of Belgrade, Belgrade, Serbia) contributed to the lab work.

### 636 SUPPLEMENTARY MATERIAL

637 Data available from the Dryad Digital Repository: [http://dx.doi.org/10.5061/dryad.\[NNNN\]](http://dx.doi.org/10.5061/dryad.[NNNN])

638

### 639 REFERENCES

640 Arcila D., Alexander Pyron R., Tyler J.C., Ortí G., Betancur-R. R. 2015. An evaluation of fossil tip-  
641 dating versus node-age calibrations in tetraodontiform fishes (Teleostei: Percomorphaceae).  
642 Mol. Phylogenet. Evol. 82:131–145.

Spasojevic et al.

- 643 Bannikov A.F., Tyler J.C., Arcila D., Carnevale G. 2017. A new family of gymnodont fish  
644 (Tetraodontiformes) from the earliest Eocene of the Peri-Tethys (Kabardino-Balkaria,  
645 northern Caucasus, Russia). *J. Syst. Palaeontol.* 15:129–146.
- 646 Beck R.M.D., Lee M.S.Y. 2014. Ancient dates or accelerated rates? Morphological clocks and the  
647 antiquity of placental mammals. *Proc. R. Soc. B Biol. Sci.* 281:20141278.
- 648 Belshaw R., Fitton M., Herniou E., Gimeno C., Quicke D.L.J. 1998. A phylogenetic reconstruction of  
649 the Ichneumonoidea (Hymenoptera) based on the D2 variable region of 28S ribosomal RNA.  
650 *Syst. Entomol.* 23:109–123.
- 651 Blum M.G.B., François O., Steel M. 2006. Which Random Processes Describe the Tree of Life? A  
652 Large-Scale Study of Phylogenetic Tree Imbalance. *Syst. Biol.* 55:685–691.
- 653 Borowiec M.L., Rabeling C., Brady S.G., Fisher B.L., Schultz T.R., Ward P.S. 2017. Compositional  
654 heterogeneity and outgroup choice influence the internal phylogeny of the ants.  
655 *bioRxiv*:173393.
- 656 Broad G.R., Shaw M.R., Fitton M.G. 2018. Ichneumonid Wasps (Hymenoptera: Ichneumonidae):  
657 Their Classification and Biology. Field Studies Council and Royal Entomological Society.
- 658 Brown J.W., Smith S.A. 2018. The Past Sure is Tense: On Interpreting Phylogenetic Divergence Time  
659 Estimates. *Syst. Biol.* 67:340–353.
- 660 Close R.A., Johanson Z., Tyler J.C., Harrington R.C., Friedman M. 2016. Mosaicism in a New  
661 Eocene Pufferfish Highlights Rapid Morphological Innovation Near the Origin of Crown  
662 Tetraodontiforms. *Palaeontology.* 59:499–514.
- 663 Deans A.R., Basibuyuk H.H., Azar D., Nel A. 2004. Descriptions of two new Early Cretaceous  
664 (Hauterivian) ensign wasp genera (Hymenoptera: Evaniidae) from Lebanese amber. *Cretac.*  
665 *Res.* 25:509–516.



## TAXON SAMPLING IN TOTAL-EVIDENCE DATING

- 666 Dornburg A., Friedman M., Near T.J. 2015. Phylogenetic analysis of molecular and morphological  
667 data highlights uncertainty in the relationships of fossil and living species of Elopomorpha  
668 (Actinopterygii: Teleostei). *Mol. Phylogenet. Evol.* 89:205–218.
- 669 Dowton M., Austin A.D. 1994. Molecular phylogeny of the insect order Hymenoptera: apocritan  
670 relationships. *Proc. Natl. Acad. Sci.* 91:9911–9915.
- 671 Duchêne D., Duchêne S., Ho S.Y.W. 2015. Tree imbalance causes a bias in phylogenetic estimation  
672 of evolutionary timescales using heterochronous sequences. *Mol. Ecol. Resour.* 15:785–794.
- 673 Duchêne S., Lanfear R., Ho S.Y.W. 2014. The impact of calibration and clock-model choice on  
674 molecular estimates of divergence times. *Mol. Phylogenet. Evol.* 78:277–289.
- 675 Dunn C.W., Hejnol A., Matus D.Q., Pang K., Browne W.E., Smith S.A., Seaver E., Rouse G.W., Obst  
676 M., Edgecombe G.D., Sørensen M.V., Haddock S.H.D., Schmidt-Rhaesa A., Okusu A.,  
677 Kristensen R.M., Wheeler W.C., Martindale M.Q., Giribet G. 2008. Broad phylogenomic  
678 sampling improves resolution of the animal tree of life. *Nature.* 452:745–749.
- 679 Eldijk T.J.B. van, Wappler T., Strother P.K., Weijst C.M.H. van der, Rajaei H., Visscher H.,  
680 Schootbrugge B. van de. 2018. A Triassic-Jurassic window into the evolution of Lepidoptera.  
681 *Sci. Adv.* 4:e1701568.
- 682 Fitch W.M., Bruschi M. 1987. The evolution of prokaryotic ferredoxins--with a general method  
683 correcting for unobserved substitutions in less branched lineages. *Mol. Biol. Evol.* 4:381–394.
- 684 Förster A. 1869. Synopsis der Familien und Gattungen der Ichneumoniden. *Verhandlungen des*  
685 *Naturhistorischen Vereins der Preussischen Rheinlande und Westfalens.* 25:135–221.
- 686 Gauld I.D., Mound L.A. 1982. Homoplasy and the delineation of holophyletic genera in some insect  
687 groups. *Syst. Entomol.* 7:73–86.

Spasojevic et al.

- 688 Gauld I.D., Wahl D.B., Broad G.R. 2002. The suprageneric groups of the Pimplinae (Hymenoptera:  
689 Ichneumonidae): a cladistic re-evaluation and evolutionary biological study. *Zool. J. Linn.*  
690 *Soc.* 136:421–485.
- 691 Gavryushkina A., Welch D., Stadler T., Drummond A.J. 2014. Bayesian Inference of Sampled  
692 Ancestor Trees for Epidemiology and Fossil Calibration. *PLOS Comput. Biol.* 10:e1003919.
- 693 Giribet G., Ribera C. 1998. The Position of Arthropods in the Animal Kingdom: A Search for a  
694 Reliable Outgroup for Internal Arthropod Phylogeny. *Mol. Phylogenet. Evol.* 9:481–488.
- 695 Graham S.W., Olmstead R.G., Barrett S.C.H. 2002. Rooting Phylogenetic Trees with Distant  
696 Outgroups: A Case Study from the Commelinoid Monocots. *Mol. Biol. Evol.* 19:1769–1781.
- 697 Graybeal A. 1998. Is It Better to Add Taxa or Characters to a Difficult Phylogenetic Problem? *Syst.*  
698 *Biol.* 47:9–17.
- 699 Grimaldi D. 1999. The Co-Radiations of Pollinating Insects and Angiosperms in the Cretaceous. *Ann.*  
700 *Mo. Bot. Gard.* 86:373–406.
- 701 Grimm G.W., Kapli P., Bomfleur B., McLoughlin S., Renner S.S. 2015. Using More Than the Oldest  
702 Fossils: Dating Osmundaceae with Three Bayesian Clock Approaches. *Syst. Biol.* 64:396–  
703 405.
- 704 Guillaume T., Cooper N. 2016. Effects of missing data on topological inference using a Total  
705 Evidence approach. *Mol. Phylogenet. Evol.* 94, Part A:146–158.
- 706 Harrington S.M., Reeder T.W. 2017. Phylogenetic inference and divergence dating of snakes using  
707 molecules, morphology and fossils: new insights into convergent evolution of feeding  
708 morphology and limb reduction. *Biol. J. Linn. Soc.* 121:379–394.

## TAXON SAMPLING IN TOTAL-EVIDENCE DATING

- 709 Hayes K.A., Cowie R.H., Thiengo S.C. 2009. A global phylogeny of apple snails: Gondwanan origin,  
710 generic relationships, and the influence of outgroup choice (Caenogastropoda:  
711 Ampullariidae). *Biol. J. Linn. Soc.* 98:61–76.
- 712 Heard S.B. 1992. Patterns in Tree Balance Among Cladistic, Phenetic, and Randomly Generated  
713 Phylogenetic Trees. *Evolution.* 46:1818–1826.
- 714 Heath T.A., Hedtke S.M., Hillis D.M. 2008. Taxon sampling and the accuracy of phylogenetic  
715 analyses. *J. Syst. Evol.*:19.
- 716 Heath T.A., Huelsenbeck J.P., Stadler T. 2014. The fossilized birth–death process for coherent  
717 calibration of divergence-time estimates. *Proc. Natl. Acad. Sci.* 111:E2957–E2966.
- 718 Herrera J.P., Davalos L.M. 2016. Phylogeny and Divergence Times of Lemurs Inferred with Recent  
719 and Ancient Fossils in the Tree. *Syst. Biol.* 65:772–791.
- 720 Höhna S., Stadler T., Ronquist F., Britton T. 2011. Inferring Speciation and Extinction Rates under  
721 Different Sampling Schemes. *Mol. Biol. Evol.* 28:2577–2589.
- 722 Holland B.R., Penny D., Hendy M.D., Sullivan J. 2003. Outgroup Misplacement and Phylogenetic  
723 Inaccuracy Under a Molecular Clock—A Simulation Study. *Syst. Biol.* 52:229–238.
- 724 Katoh K., Standley D.M. 2013. MAFFT multiple sequence alignment software version 7:  
725 improvements in performance and usability. *Mol. Biol. Evol.* 30:772–780.
- 726 Kealy S., Beck R. 2017. Total evidence phylogeny and evolutionary timescale for Australian  
727 faunivorous marsupials (Dasyuromorphia). *BMC Evol. Biol.* 17:240.
- 728 Kearse M., Moir R., Wilson A., Stones-Havas S., Cheung M., Sturrock S., Buxton S., Cooper A.,  
729 Markowitz S., Duran C., Thierer T., Ashton B., Meintjes P., Drummond A. 2012. Geneious  
730 Basic: An integrated and extendable desktop software platform for the organization and  
731 analysis of sequence data. *Bioinformatics.* 28:1647–1649.

Spasojevic et al.

- 732 Kirchberger P.C., Sefc K.M., Sturmbauer C., Kobl Müller S. 2014. Outgroup effects on root position  
733 and tree topology in the AFLP phylogeny of a rapidly radiating lineage of cichlid fish. *Mol.*  
734 *Phylogenet. Evol.* 70:57–62.
- 735 Kittel R.N., Austin A.D., Klopstein S. 2016. Molecular and morphological phylogenetics of  
736 chelonine parasitoid wasps (Hymenoptera: Braconidae), with a critical assessment of  
737 divergence time estimations. *Mol. Phylogenet. Evol.* 101:224–241.
- 738 Kjer K., Borowiec M.L., Frandsen P.B., Ware J., Wiegmann B.M. 2016. Advances using molecular  
739 data in insect systematics. *Curr. Opin. Insect Sci.* 18:40–47.
- 740 Klopstein S., Langille B., Spasojevic T., Broad G.R., Cooper S.J.B., Austin A.D., Niehuis O. 2019.  
741 Hybrid capture data unravel a rapid radiation of pimpliform parasitoid wasps (Hymenoptera:  
742 Ichneumonidae: Pimpliformes). *Syst. Entomol.* 44:361–383.
- 743 Klopstein S., Massingham T., Goldman N. 2017. More on the Best Evolutionary Rate for  
744 Phylogenetic Analysis. *Syst. Biol.* 66:769–785.
- 745 Klopstein S., Spasojevic T. 2019. Illustrating phylogenetic placement of fossils using RoguePlots:  
746 An example from ichneumonid parasitoid wasps (Hymenoptera, Ichneumonidae) and an  
747 extensive morphological matrix. *PLOS ONE*:425090.
- 748 Kopylov D.S. 2009. A new subfamily of ichneumonids from the Lower Cretaceous of Transbaikalia  
749 and Mongolia (Insecta: Hymenoptera: Ichneumonidae). *Paleontol. J.* 43:83–93.
- 750 Kopylov D.S. 2010a. Ichneumonids of the subfamily Tanychorinae (Insecta: Hymenoptera:  
751 Ichneumonidae) from the Lower Cretaceous of Transbaikalia and Mongolia. *Paleontol. J.*  
752 44:180–187.
- 753 Kopylov D.S. 2010b. A new subfamily of ichneumon wasps (Insecta: Hymenoptera: Ichneumonidae)  
754 from the Upper Cretaceous of the Russian Far East. *Paleontol. J.* 44:422–433.

## TAXON SAMPLING IN TOTAL-EVIDENCE DATING

- 755 Kopylov D.S., Brothers D.J., Rasnitsyn A.P. 2010. Two New Labenopimpline Ichneumonids  
756 (Hymenoptera: Ichneumonidae) from the Upper Cretaceous of Southern Africa. *Afr.*  
757 *Invertebr.* 51:423–430.
- 758 Lanfear R., Frandsen P.B., Wright A.M., Senfeld T., Calcott B. 2017. PartitionFinder 2: New  
759 Methods for Selecting Partitioned Models of Evolution for Molecular and Morphological  
760 Phylogenetic Analyses. *Mol. Biol. Evol.* 34:772–773.
- 761 Lee M.S.Y. 2016. Multiple morphological clocks and total-evidence tip-dating in mammals. *Biol.*  
762 *Lett.* 12:20160033.
- 763 Lewis P.O. 2001. A Likelihood Approach to Estimating Phylogeny from Discrete Morphological  
764 Character Data. *Syst. Biol.* 50:913–925.
- 765 Li L., Kopylov D.S., Shih C., Ren D. 2017. The first record of Ichneumonidae (Insecta:  
766 Hymenoptera) from the Upper Cretaceous of Myanmar. *Cretac. Res.* 70:152–162.
- 767 Linder H.P., Hardy C.R., Rutschmann F. 2005. Taxon sampling effects in molecular clock dating: An  
768 example from the African Restionaceae. *Mol. Phylogenet. Evol.* 35:569–582.
- 769 McCormack J.E., Hird S.M., Zellmer A.J., Carstens B.C., Brumfield R.T. 2013. Applications of next-  
770 generation sequencing to phylogeography and phylogenetics. *Mol. Phylogenet. Evol.* 66:526–  
771 538.
- 772 McKellar R.C., Kopylov D.S., Engel M.S. 2013. Ichneumonidae (Insecta: Hymenoptera) in Canadian  
773 Late Cretaceous amber. *Foss. Rec.* 16:217–227.
- 774 Menier J.J., Nel A., Waller A., Ploëg G.D. 2004. A new fossil ichneumon wasp from the Lowermost  
775 Eocene amber of Paris Basin (France), with a checklist of fossil Ichneumonoidea s.l. (Insecta:  
776 Hymenoptera: Ichneumonidae: Metopiinae). *Geol. Acta Int. Earth Sci. J.* 2.

Spasojevic et al.

- 777 Milne R.I. 2009. Effects of taxon sampling on molecular dating for within-genus divergence events,  
778 when deep fossils are used for calibration. *J. Syst. Evol.* 47:383–401.
- 779 Misof B., Liu S., Meusemann K., Peters R.S., Donath A., Mayer C., Frandsen P.B., Ware J., Flouri T.,  
780 Beutel R.G., Niehuis O., Petersen M., Izquierdo-Carrasco F., Wappler T., Rust J., Aberer  
781 A.J., Aspöck U., Aspöck H., Bartel D., Blanke A., Berger S., Böhm A., Buckley T.R., Calcott  
782 B., Chen J., Friedrich F., Fukui M., Fujita M., Greve C., Grobe P., Gu S., Huang Y., Jermini  
783 L.S., Kawahara A.Y., Krogmann L., Kubiak M., Lanfear R., Letsch H., Li Y., Li Z., Li J., Lu  
784 H., Machida R., Mashimo Y., Kapli P., McKenna D.D., Meng G., Nakagaki Y., Navarrete-  
785 Heredia J.L., Ott M., Ou Y., Pass G., Podsiadlowski L., Pohl H., Reumont B.M. von, Schütte  
786 K., Sekiya K., Shimizu S., Slipinski A., Stamatakis A., Song W., Su X., Szucsich N.U., Tan  
787 M., Tan X., Tang M., Tang J., Timelthaler G., Tomizuka S., Trautwein M., Tong X.,  
788 Uchifune T., Walz M.G., Wiegmann B.M., Wilbrandt J., Wipfler B., Wong T.K.F., Wu Q.,  
789 Wu G., Xie Y., Yang S., Yang Q., Yeates D.K., Yoshizawa K., Zhang Q., Zhang R., Zhang  
790 W., Zhang Y., Zhao J., Zhou C., Zhou L., Ziesmann T., Zou S., Li Y., Xu X., Zhang Y., Yang  
791 H., Wang J., Wang J., Kjer K.M., Zhou X. 2014. Phylogenomics resolves the timing and  
792 pattern of insect evolution. *Science.* 346:763–767.
- 793 Nixon K.C., Carpenter J.M. 1993. On Outgroups. *Cladistics.* 9:413–426.
- 794 O’Hanlon S.J., Rieux A., Farrer R.A., Rosa G.M., Waldman B., Bataille A., Kosch T.A., Murray  
795 K.A., Brankovics B., Fumagalli M., Martin M.D., Wales N., Alvarado-Rybak M., Bates K.A.,  
796 Berger L., Böll S., Brookes L., Clare F., Courtois E.A., Cunningham A.A., Doherty-Bone  
797 T.M., Ghosh P., Gower D.J., Hintz W.E., Höglund J., Jenkinson T.S., Lin C.-F., Laurila A.,  
798 Loyau A., Martel A., Meurling S., Miaud C., Minting P., Pasmans F., Schmeller D.S.,  
799 Schmidt B.R., Shelton J.M.G., Skerratt L.F., Smith F., Soto-Azat C., Spagnoletti M., Tessa  
800 G., Toledo L.F., Valenzuela-Sánchez A., Verster R., Vörös J., Webb R.J., Wierzbicki C.,  
801 Wombwell E., Zamudio K.R., Aanensen D.M., James T.Y., Gilbert M.T.P., Weldon C.,

## TAXON SAMPLING IN TOTAL-EVIDENCE DATING

- 802 Bosch J., Balloux F., Garner T.W.J., Fisher M.C. 2018. Recent Asian origin of chytrid fungi  
803 causing global amphibian declines. *Science*. 360:621–627.
- 804 O'Reilly J.E., Donoghue P.C.J. 2016. Tips and nodes are complementary not competing approaches  
805 to the calibration of molecular clocks. *Biol. Lett.* 12:20150975.
- 806 O'Reilly J.E., Reis M. dos, Donoghue P.C.J. 2015. Dating Tips for Divergence-Time Estimation.  
807 *Trends Genet.* 31:637–650.
- 808 Parins-Fukuchi C., Brown J.W. 2017. What drives results in Bayesian morphological clock analyses?  
809 *bioRxiv*.:219048.
- 810 Peters R.S., Krogmann L., Mayer C., Donath A., Gunkel S., Meusemann K., Kozlov A.,  
811 Podsiadlowski L., Petersen M., Lanfear R., Diez P.A., Heraty J., Kjer K.M., Klopstein S.,  
812 Meier R., Polidori C., Schmitt T., Liu S., Zhou X., Wappler T., Rust J., Misof B., Niehuis O.  
813 2017. Evolutionary History of the Hymenoptera. *Curr. Biol. CB.* 27:1013–1018.
- 814 Philippe H., Brinkmann H., Lavrov D.V., Littlewood D.T.J., Manuel M., Wörheide G., Baurain D.  
815 2011. Resolving Difficult Phylogenetic Questions: Why More Sequences Are Not Enough.  
816 *PLOS Biol.* 9:e1000602.
- 817 Pick K.S., Philippe H., Schreiber F., Erpenbeck D., Jackson D.J., Wrede P., Wiens M., Alié A.,  
818 Morgenstern B., Manuel M., Wörheide G. 2010. Improved Phylogenomic Taxon Sampling  
819 Noticeably Affects Nonbilaterian Relationships. *Mol. Biol. Evol.* 27:1983–1987.
- 820 Puslednik L., Serb J.M. 2008. Molecular phylogenetics of the Pectinidae (Mollusca: Bivalvia) and  
821 effect of increased taxon sampling and outgroup selection on tree topology. *Mol. Phylogenet.*  
822 *Evol.* 48:1178–1188.
- 823 Pyron R.A. 2011. Divergence Time Estimation Using Fossils as Terminal Taxa and the Origins of  
824 Lissamphibia. *Syst. Biol.* 60:466–481.

Spasojevic et al.

- 825 Quicke D.L.J. 2014. *The Braconid and Ichneumonid Parasitoid Wasps: Biology, Systematics,*  
826 *Evolution and Ecology.* John Wiley & Sons.
- 827 Quicke D.L.J., Basibuyuk H.H., Rasnitsyn A.P. 1999. Morphological, palaeontological and molecular  
828 aspects of ichneumonoid phylogeny (Hymenoptera, Insecta). *Zool. Scr.* 28:175–202.
- 829 Quicke D.L.J., Fitton M.G., Notton D.G., Broad G.R., Dolphin K. 2000. Phylogeny of the subfamilies  
830 of Ichneumonidae (Hymenoptera): a simultaneous molecular and morphological analysis. In:  
831 Austin A.D., Dowton M., editors. *Hymenoptera: Evolution, Biodiversity and Biological*  
832 *Control.* .
- 833 Quicke D.L.J., Laurenne N.M., Fitton M.G., Broad G.R. 2009. A thousand and one wasps: a 28S  
834 rDNA and morphological phylogeny of the Ichneumonidae (Insecta: Hymenoptera) with an  
835 investigation into alignment parameter space and elision. *J. Nat. Hist.* 43:1305–1421.
- 836 Rambaut A., Drummond A.J., Xie D., Baele G., Suchard M.A., Susko E. 2018. Posterior  
837 Summarization in Bayesian Phylogenetics Using Tracer 1.7. *Syst. Biol.* 67:901–904.
- 838 Rasnitsyn A.P., Bashkuev A.S., Kopylov D.S., Lukashevich E.D., Ponomarenko A.G., Popov Yu.A.,  
839 Rasnitsyn D.A., Ryzhkova O.V., Sidorchuk E.A., Sukatsheva I.D., Vorontsov D.D. 2016.  
840 Sequence and scale of changes in the terrestrial biota during the Cretaceous (based on  
841 materials from fossil resins). *Cretac. Res.* 61:234–255.
- 842 Rasnitsyn A.P., Quicke D.L. 2002. *History of Insects.* Springer Science & Business Media.
- 843 Ronquist F., Klopfstein S., Vilhelmsen L., Schulmeister S., Murray D.L., Rasnitsyn A.P. 2012a. A  
844 Total-Evidence Approach to Dating with Fossils, Applied to the Early Radiation of the  
845 Hymenoptera. *Syst. Biol.* 61:973–999.
- 846 Ronquist F., Lartillot N., Phillips M.J. 2016. Closing the gap between rocks and clocks using total-  
847 evidence dating. *Philos. Trans. R. Soc. B-Biol. Sci.* 371:20150136.



## TAXON SAMPLING IN TOTAL-EVIDENCE DATING

- 848 Ronquist F., Teslenko M., van der Mark P., Ayres D.L., Darling A., Höhna S., Larget B., Liu L.,  
849 Suchard M.A., Huelsenbeck J.P. 2012b. MrBayes 3.2: Efficient Bayesian Phylogenetic  
850 Inference and Model Choice Across a Large Model Space. *Syst. Biol.* 61:539–542.
- 851 Rota-Stabelli O., Telford M.J. 2008. A multi criterion approach for the selection of optimal outgroups  
852 in phylogeny: Recovering some support for Mandibulata over Myriochelata using  
853 mitogenomics. *Mol. Phylogenet. Evol.* 48:103–111.
- 854 Saladin B., Leslie A.B., Wueest R.O., Litsios G., Conti E., Salamin N., Zimmermann N.E. 2017.  
855 Fossils matter: improved estimates of divergence times in *Pinus* reveal older diversification.  
856 *Bmc Evol. Biol.* 17:95.
- 857 Sharkey M.J., Wahl D.B. 1992. Cladistics of the Ichneumonoidea (Hymenoptera). *J. Hymenopt. Res.*  
858 1:15–24.
- 859 Soares A.E.R., Schrago C.G. 2012. The Influence of Taxon Sampling and Tree Shape on Molecular  
860 Dating: An Empirical Example from Mammalian Mitochondrial Genomes. *Bioinforma. Biol.*  
861 *Insights.* 6:BBI.S9677.
- 862 Soares A.E.R., Schrago C.G. 2015. The influence of taxon sampling on Bayesian divergence time  
863 inference under scenarios of rate heterogeneity among lineages. *J. Theor. Biol.* 364:31–39.
- 864 Spasojevic T., Broad G.R., Bennett A.M.R., Klopstein S. 2018a. Ichneumonid parasitoid wasps from  
865 the Early Eocene Green River Formation: five new species and a revision of the known fauna  
866 (Hymenoptera, Ichneumonidae). *PalZ.* 92:35–63.
- 867 Spasojevic T., Wedmann S., Klopstein S. 2018b. Seven remarkable new fossil species of parasitoid  
868 wasps (Hymenoptera, Ichneumonidae) from the Eocene Messel Pit. *PLOS ONE.*  
869 13:e0197477.

Spasojevic et al.

- 870 Tarrío R., Rodríguez-Trelles F., Ayala F.J. 2000. Tree Rooting with Outgroups When They Differ in  
871 Their Nucleotide Composition from the Ingroup: The *Drosophila saltans* and *willistoni*  
872 Groups, a Case Study. *Mol. Phylogenet. Evol.* 16:344–349.
- 873 Thomas J.A., Trueman J.W.H., Rambaut A., Welch J.J. 2013. Relaxed Phylogenetics and the  
874 Palaeoptera Problem: Resolving Deep Ancestral Splits in the Insect Phylogeny. *Syst. Biol.*  
875 62:285–297.
- 876 Tong K.J., Duchêne S., Ho S.Y.W., Lo N. 2015. Comment on “Phylogenomics resolves the timing  
877 and pattern of insect evolution.” *Science.* 349:487–487.
- 878 Townes H.K. 1971. The genera of Ichneumonidae, Part 4. Ann Arbor, MI: The American  
879 Entomological Institute.
- 880 Travouillon K.J., Phillips M.J. 2018. Total evidence analysis of the phylogenetic relationships of  
881 bandicoots and bilbies (Marsupialia: Peramelemorphia): reassessment of two species and  
882 description of a new species. *Zootaxa.* 4378:224.
- 883 Wahl D., Gauld I. 1998. The cladistics and higher classification of the Pimpliformes (Hymenoptera:  
884 Ichneumonidae). *Syst. Entomol.* 23:265–298.
- 885 Ware J.L., Litman J., Klass K.-D., Spearman L.A. 2008. Relationships among the major lineages of  
886 Dictyoptera: the effect of outgroup selection on dictyopteran tree topology. *Syst. Entomol.*  
887 33:429–450.
- 888 Warnock R.C.M., Yang Z., Donoghue P.C.J. 2011. Exploring uncertainty in the calibration of the  
889 molecular clock. *Biol. Lett.*:rsbl20110710.
- 890 Wertheim J.O., Fourment M., Pond K., L S. 2012. Inconsistencies in Estimating the Age of HIV-1  
891 Subtypes Due to Heterotachy. *Mol. Biol. Evol.* 29:451–456.

## TAXON SAMPLING IN TOTAL-EVIDENCE DATING

- 892 Wheeler W.C. 1990. Nucleic Acid Sequence Phylogeny and Random Outgroups. *Cladistics*. 6:363–  
893 367.
- 894 Whitfield J.B. 2002. Estimating the age of the polydnavirus/braconid wasp symbiosis. *Proc. Natl.*  
895 *Acad. Sci.* 99:7508–7513.
- 896 Wilberg E.W. 2015. What’s in an Outgroup? The Impact of Outgroup Choice on the Phylogenetic  
897 Position of Thalattosuchia (Crocodylomorpha) and the Origin of Crocodyliformes. *Syst. Biol.*  
898 64:621–637.
- 899 Yu D.S.K., van Achterberg C., Horstmann K. 2016. *Taxapad 2016, Ichneumonoidea 2015*. Nepean,  
900 Ontario, Canada: .
- 901 Zhang C., Stadler T., Klopstein S., Heath T.A., Ronquist F. 2016. Total-Evidence Dating under the  
902 Fossilized Birth–Death Process. *Syst. Biol.* 65:228–249.
- 903 Zuckerkandl E., Pauling L. 1962. Molecular disease, evolution and genetic heterogeneity. *Horizons in*  
904 *Biochemistry*. Academic Press. p. 189–225.
- 905 Zwickl D.J., Hillis D.M. 2002. Increased Taxon Sampling Greatly Reduces Phylogenetic Error. *Syst.*  
906 *Biol.* 51:588–598.
- 907
